# Supplementary material for: Mechanistic studies on covalent assemblies of metal-mediated hemi-aminal ethers
Source: Royal Society of Chemistry journal article supplement (doi:10.1039/c4sc02495h), 2014-09-10
Supplement: c4sc02495h1.pdf [file c4sc02495h1.pdf]

## **Crystallographic Supporting Information for Pyridinium Salt (5).**

### **Mechanistic Studies on Dynamic Multi-Component Covalent Assemblies of Metal-Mediated Hemi-Aminal Ethers†**

Hyun Hwa Jo,<sup>a</sup> Ramakrishna Edupuganti,<sup>a,c</sup> Lei You,<sup>b</sup> Kevin N. Dalby<sup>c</sup> and

Eric V. Anslyn\*<sup>a</sup>

<sup>a</sup> *Department of Chemistry, The University of Texas at Austin, Austin, Texas, 78712, USA.*

<sup>b</sup> *Fujian Institute of Research on the Structure of Matter, Chinese Academy of Sciences, Fuzhou, 350002, P.R.China.*

<sup>c</sup> *Division of Medicinal Chemistry, The University of Texas at Austin, Austin, Texas, 78712, USA.*

#### **Content**

|                               |      |
|-------------------------------|------|
| X-ray Experimental Procedures | XS1  |
| Figures and Tables            | XS2  |
| References                    | XS14 |

## X-ray Experimental Procedures:

X-ray Experimental for  $(C_{18}H_{18}N_4)^{2+} \cdot 2BF_4$ : The data crystal was cut from a larger crystal and had approximate dimensions; 0.22 x 0.20 x 0.10 mm. The data were collected at -120 °C on a Nonius Kappa CCD diffractometer using a Bruker AXS Apex II detector and a graphite monochromator with MoK $\alpha$  radiation ( $\lambda = 0.71073 \text{ \AA}$ ). Reduced temperatures were maintained by use of an Oxford Cryosystems 600 low-temperature device. A total of 1117 frames of data were collected using  $\omega$  and  $\phi$ -scans with a scan range of  $1.1^\circ$  and a counting time of 44 seconds per frame. Details of crystal data, data collection and structure refinement are listed in Table 1. Data reduction were performed using SAINT V8.27B.<sup>1</sup> The structure was solved by direct methods using SUPERFLIP<sup>2</sup> and refined by full-matrix least-squares on  $F^2$  with anisotropic displacement parameters for the non-H atoms using SHELXL-2013.<sup>3</sup> Structure analysis was aided by use of the programs PLATON98<sup>4</sup> and WinGX.<sup>5</sup> Most of the hydrogen atoms were calculated in idealized positions. The hydrogen atom bound to N4 was observed in a  $\Delta F$  map and refined with an isotropic displacement parameter.

The function,  $\sum w(|F_o|^2 - |F_c|^2)^2$ , was minimized, where  $w = 1/[(\sigma(F_o))^2 + (0.0508 * P)^2 + (2.0034 * P)]$  and  $P = (|F_o|^2 + 2|F_c|^2)/3$ .  $R_w(F^2)$  refined to 0.128, with  $R(F)$  equal to 0.0482 and a goodness of fit,  $S$ , = 1.01. Definitions used for calculating  $R(F)$ ,  $R_w(F^2)$  and the goodness of fit,  $S$ , are given below.<sup>6</sup> The data were checked for secondary extinction but no correction was necessary. Neutral atom scattering factors and values used to calculate the linear absorption coefficient are from the International Tables for X-ray Crystallography (1992).<sup>7</sup> All figures were generated using SHELXTL/PC.<sup>8</sup> Tables of positional and thermal parameters, bond lengths and angles, torsion angles and figures are found elsewhere.

**Figure 1.** Crystal structure of cation of **5**. Displacement ellipsoids are scaled to the 50% probability level.

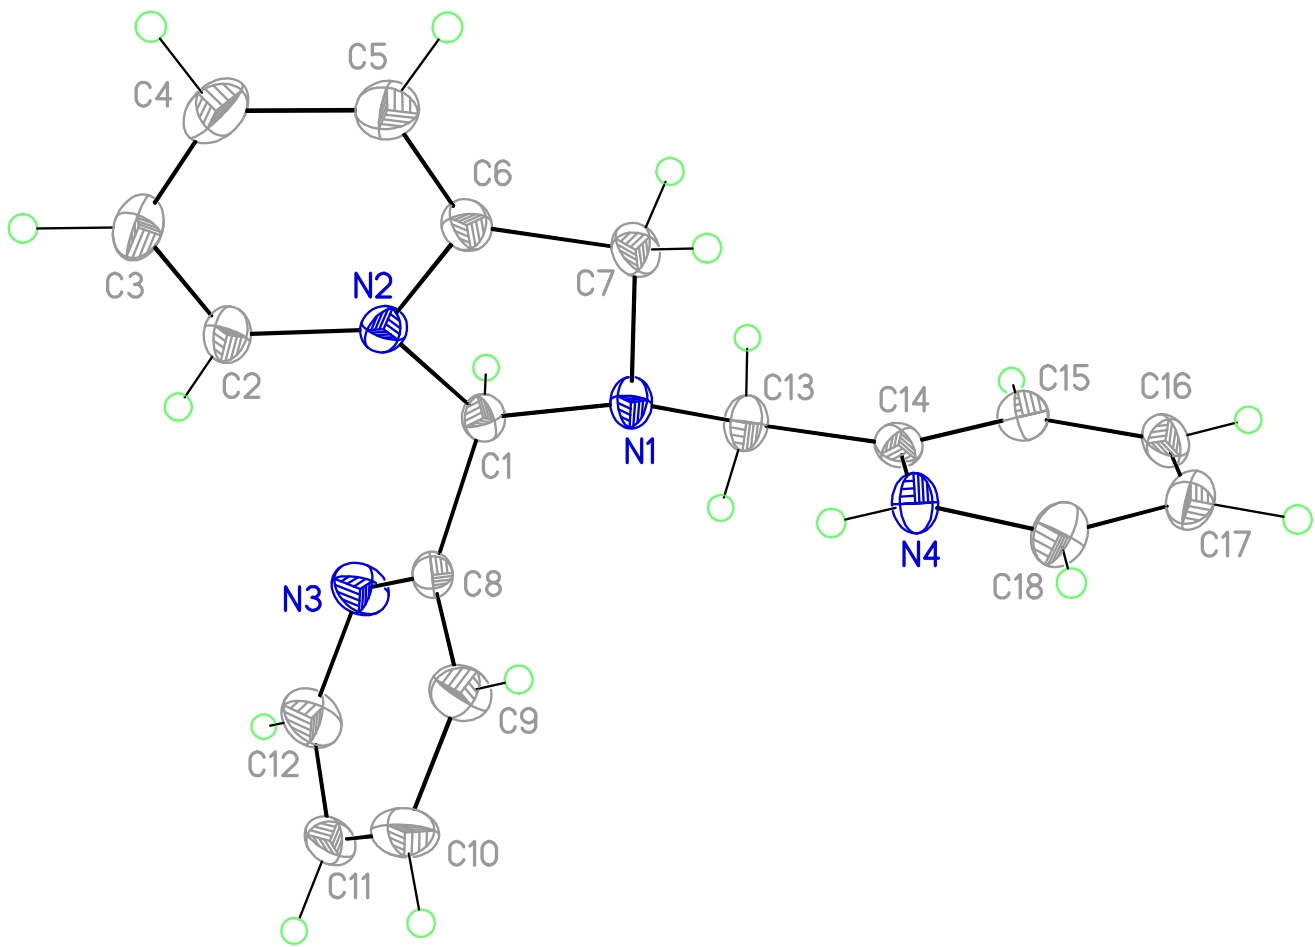

**Table 1.** Crystal data and structure refinement for pyridinium salt (5).

|                                   |                                                                                                                               |
|-----------------------------------|-------------------------------------------------------------------------------------------------------------------------------|
| Empirical formula                 | C <sub>18</sub> H <sub>18</sub> B <sub>2</sub> F <sub>8</sub> N <sub>4</sub>                                                  |
| Formula weight                    | 463.98                                                                                                                        |
| Temperature                       | 153(2) K                                                                                                                      |
| Wavelength                        | 0.71073 Å                                                                                                                     |
| Crystal system                    | monoclinic                                                                                                                    |
| Space group                       | P 2 <sub>1</sub> /n                                                                                                           |
| Unit cell dimensions              | a = 7.9704(6) Å $\alpha = 90^\circ$ .<br>b = 9.6387(7) Å $\beta = 98.556(4)^\circ$ .<br>c = 26.395(2) Å $\gamma = 90^\circ$ . |
| Volume                            | 2005.2(3) Å <sup>3</sup>                                                                                                      |
| Z                                 | 4                                                                                                                             |
| Density (calculated)              | 1.537 Mg/m <sup>3</sup>                                                                                                       |
| Absorption coefficient            | 0.144 mm <sup>-1</sup>                                                                                                        |
| F(000)                            | 944                                                                                                                           |
| Crystal size                      | 0.220 x 0.200 x 0.100 mm                                                                                                      |
| Theta range for data collection   | 1.560 to 27.499°.                                                                                                             |
| Index ranges                      | -10 ≤ h ≤ 10, -12 ≤ k ≤ 12, -34 ≤ l ≤ 34                                                                                      |
| Reflections collected             | 52310                                                                                                                         |
| Independent reflections           | 4615 [R(int) = 0.0659]                                                                                                        |
| Completeness to theta = 25.242°   | 100.0 %                                                                                                                       |
| Absorption correction             | Semi-empirical from equivalents                                                                                               |
| Max. and min. transmission        | 1.00 and 0.875                                                                                                                |
| Refinement method                 | Full-matrix least-squares on F <sup>2</sup>                                                                                   |
| Data / restraints / parameters    | 4615 / 0 / 293                                                                                                                |
| Goodness-of-fit on F <sup>2</sup> | 1.012                                                                                                                         |
| Final R indices [I > 2σ(I)]       | R1 = 0.0482, wR2 = 0.1119                                                                                                     |
| R indices (all data)              | R1 = 0.0746, wR2 = 0.1281                                                                                                     |
| Extinction coefficient            | n/a                                                                                                                           |
| Largest diff. peak and hole       | 0.693 and -0.446 e.Å <sup>-3</sup>                                                                                            |

**Table 2.** Atomic coordinates ( $\times 10^4$ ) and equivalent isotropic displacement parameters ( $\text{\AA}^2 \times 10^3$ ) for **5**.  $U(\text{eq})$  is defined as one third of the trace of the orthogonalized  $U^{ij}$  tensor.

|     | x        | y        | z       | $U(\text{eq})$ |
|-----|----------|----------|---------|----------------|
| C1  | 21(2)    | 8107(2)  | 6827(1) | 17(1)          |
| C2  | -1418(3) | 10189(2) | 7143(1) | 24(1)          |
| C3  | -2515(3) | 11277(2) | 7021(1) | 30(1)          |
| C4  | -3155(3) | 11542(2) | 6513(1) | 32(1)          |
| C5  | -2688(3) | 10717(2) | 6129(1) | 28(1)          |
| C6  | -1592(2) | 9632(2)  | 6263(1) | 21(1)          |
| C7  | -920(3)  | 8533(2)  | 5950(1) | 22(1)          |
| C8  | 1508(2)  | 8213(2)  | 7251(1) | 18(1)          |
| C9  | 2998(3)  | 8877(2)  | 7188(1) | 28(1)          |
| C10 | 4268(3)  | 8944(3)  | 7602(1) | 35(1)          |
| C11 | 4012(3)  | 8351(2)  | 8058(1) | 30(1)          |
| C12 | 2481(3)  | 7714(2)  | 8087(1) | 32(1)          |
| C13 | 880(3)   | 6504(2)  | 6214(1) | 21(1)          |
| C14 | 1745(2)  | 6382(2)  | 5750(1) | 18(1)          |
| C15 | 1743(2)  | 5185(2)  | 5465(1) | 21(1)          |
| C16 | 2592(3)  | 5154(2)  | 5046(1) | 23(1)          |
| C17 | 3453(3)  | 6314(2)  | 4917(1) | 24(1)          |
| C18 | 3457(3)  | 7483(2)  | 5211(1) | 24(1)          |
| N1  | 480(2)   | 7944(2)  | 6315(1) | 17(1)          |
| N2  | -997(2)  | 9407(2)  | 6759(1) | 18(1)          |
| N3  | 1226(2)  | 7631(2)  | 7689(1) | 27(1)          |
| N4  | 2601(2)  | 7487(2)  | 5613(1) | 20(1)          |
| B1  | 2599(3)  | 11281(2) | 5493(1) | 26(1)          |
| B2  | 6047(3)  | 5942(3)  | 6481(1) | 23(1)          |
| F1  | 986(2)   | 11795(2) | 5362(1) | 63(1)          |
| F2  | 2668(2)  | 10282(1) | 5877(1) | 50(1)          |
| F3  | 3683(2)  | 12348(1) | 5667(1) | 41(1)          |
| F4  | 3150(2)  | 10689(2) | 5065(1) | 45(1)          |
| F5  | 6127(2)  | 7336(2)  | 6603(1) | 59(1)          |
| F6  | 7448(2)  | 5298(2)  | 6754(1) | 48(1)          |

|    |         |         |         |       |
|----|---------|---------|---------|-------|
| F7 | 6089(2) | 5809(2) | 5967(1) | 56(1) |
| F8 | 4593(2) | 5380(2) | 6614(1) | 51(1) |

---

**Table 3.** Bond lengths [Å] and angles [°] for **5**.

|          |            |          |          |
|----------|------------|----------|----------|
| C1-N1    | 1.461(2)   | C12-N3   | 1.341(3) |
| C1-N2    | 1.489(2)   | C12-H12  | 0.95     |
| C1-C8    | 1.507(3)   | C13-N1   | 1.458(2) |
| C1-H1    | 1.00       | C13-C14  | 1.499(3) |
| C2-N2    | 1.345(2)   | C13-H13A | 0.99     |
| C2-C3    | 1.373(3)   | C13-H13B | 0.99     |
| C2-H2    | 0.95       | C14-N4   | 1.343(2) |
| C3-C4    | 1.385(3)   | C14-C15  | 1.376(3) |
| C3-H3    | 0.95       | C15-C16  | 1.381(3) |
| C4-C5    | 1.384(3)   | C15-H15  | 0.95     |
| C4-H4    | 0.95       | C16-C17  | 1.381(3) |
| C5-C6    | 1.375(3)   | C16-H16  | 0.95     |
| C5-H5    | 0.95       | C17-C18  | 1.369(3) |
| C6-N2    | 1.342(2)   | C17-H17  | 0.95     |
| C6-C7    | 1.491(3)   | C18-N4   | 1.344(3) |
| C7-N1    | 1.476(2)   | C18-H18  | 0.95     |
| C7-H7A   | 0.99       | N4-H4N   | 0.86(3)  |
| C7-H7B   | 0.99       | B1-F1    | 1.373(3) |
| C8-N3    | 1.334(2)   | B1-F3    | 1.378(3) |
| C8-C9    | 1.381(3)   | B1-F4    | 1.393(3) |
| C9-C10   | 1.378(3)   | B1-F2    | 1.394(3) |
| C9-H9    | 0.95       | B2-F7    | 1.368(3) |
| C10-C11  | 1.373(3)   | B2-F8    | 1.371(3) |
| C10-H10  | 0.95       | B2-F5    | 1.381(3) |
| C11-C12  | 1.379(3)   | B2-F6    | 1.382(3) |
| C11-H11  | 0.95       |          |          |
| N1-C1-N2 | 100.62(14) | C3-C2-H2 | 120.9    |
| N1-C1-C8 | 114.61(15) | C2-C3-C4 | 119.8(2) |
| N2-C1-C8 | 112.80(15) | C2-C3-H3 | 120.1    |
| N1-C1-H1 | 109.5      | C4-C3-H3 | 120.1    |
| N2-C1-H1 | 109.5      | C5-C4-C3 | 120.2(2) |
| C8-C1-H1 | 109.5      | C5-C4-H4 | 119.9    |
| N2-C2-C3 | 118.28(19) | C3-C4-H4 | 119.9    |
| N2-C2-H2 | 120.9      | C6-C5-C4 | 118.6(2) |

|               |            |             |            |
|---------------|------------|-------------|------------|
| C6-C5-H5      | 120.7      | C14-C15-C16 | 119.62(18) |
| C4-C5-H5      | 120.7      | C14-C15-H15 | 120.2      |
| N2-C6-C5      | 119.51(18) | C16-C15-H15 | 120.2      |
| N2-C6-C7      | 108.76(16) | C17-C16-C15 | 120.12(18) |
| C5-C6-C7      | 131.68(18) | C17-C16-H16 | 119.9      |
| N1-C7-C6      | 102.10(15) | C15-C16-H16 | 119.9      |
| N1-C7-H7A     | 111.3      | C18-C17-C16 | 119.01(18) |
| C6-C7-H7A     | 111.3      | C18-C17-H17 | 120.5      |
| N1-C7-H7B     | 111.3      | C16-C17-H17 | 120.5      |
| C6-C7-H7B     | 111.3      | N4-C18-C17  | 119.47(19) |
| H7A-C7-H7B    | 109.2      | N4-C18-H18  | 120.3      |
| N3-C8-C9      | 123.99(18) | C17-C18-H18 | 120.3      |
| N3-C8-C1      | 113.52(16) | C13-N1-C1   | 111.26(14) |
| C9-C8-C1      | 122.48(17) | C13-N1-C7   | 114.30(15) |
| C10-C9-C8     | 117.9(2)   | C1-N1-C7    | 107.15(14) |
| C10-C9-H9     | 121.0      | C6-N2-C2    | 123.56(17) |
| C8-C9-H9      | 121.0      | C6-N2-C1    | 111.24(15) |
| C11-C10-C9    | 119.3(2)   | C2-N2-C1    | 124.89(16) |
| C11-C10-H10   | 120.4      | C8-N3-C12   | 116.86(19) |
| C9-C10-H10    | 120.4      | C14-N4-C18  | 123.22(18) |
| C10-C11-C12   | 118.8(2)   | C14-N4-H4N  | 119.2(16)  |
| C10-C11-H11   | 120.6      | C18-N4-H4N  | 117.6(16)  |
| C12-C11-H11   | 120.6      | F1-B1-F3    | 109.37(19) |
| N3-C12-C11    | 123.1(2)   | F1-B1-F4    | 109.88(19) |
| N3-C12-H12    | 118.4      | F3-B1-F4    | 108.60(19) |
| C11-C12-H12   | 118.4      | F1-B1-F2    | 111.5(2)   |
| N1-C13-C14    | 111.31(15) | F3-B1-F2    | 108.51(19) |
| N1-C13-H13A   | 109.4      | F4-B1-F2    | 108.91(18) |
| C14-C13-H13A  | 109.4      | F7-B2-F8    | 111.24(19) |
| N1-C13-H13B   | 109.4      | F7-B2-F5    | 108.4(2)   |
| C14-C13-H13B  | 109.4      | F8-B2-F5    | 109.7(2)   |
| H13A-C13-H13B | 108.0      | F7-B2-F6    | 109.66(19) |
| N4-C14-C15    | 118.55(17) | F8-B2-F6    | 109.74(19) |
| N4-C14-C13    | 118.14(17) | F5-B2-F6    | 108.08(19) |
| C15-C14-C13   | 123.29(17) |             |            |



**Table 4.** Anisotropic displacement parameters ( $\text{\AA}^2 \times 10^3$ ) for **5**. The anisotropic displacement factor exponent takes the form:  $-2\pi^2 [h^2 a^{*2} U^{11} + \dots + 2 h k a^* b^* U^{12}]$

|     | U <sup>11</sup> | U <sup>22</sup> | U <sup>33</sup> | U <sup>23</sup> | U <sup>13</sup> | U <sup>12</sup> |
|-----|-----------------|-----------------|-----------------|-----------------|-----------------|-----------------|
| C1  | 18(1)           | 17(1)           | 15(1)           | 1(1)            | 5(1)            | -2(1)           |
| C2  | 23(1)           | 30(1)           | 19(1)           | -4(1)           | 8(1)            | 0(1)            |
| C3  | 28(1)           | 32(1)           | 31(1)           | -7(1)           | 10(1)           | 5(1)            |
| C4  | 26(1)           | 29(1)           | 40(1)           | 0(1)            | 6(1)            | 9(1)            |
| C5  | 28(1)           | 32(1)           | 24(1)           | 3(1)            | 1(1)            | 7(1)            |
| C6  | 21(1)           | 24(1)           | 17(1)           | 0(1)            | 3(1)            | -1(1)           |
| C7  | 27(1)           | 24(1)           | 15(1)           | 0(1)            | 1(1)            | 5(1)            |
| C8  | 19(1)           | 18(1)           | 16(1)           | -2(1)           | 3(1)            | 2(1)            |
| C9  | 26(1)           | 36(1)           | 23(1)           | 1(1)            | 5(1)            | -9(1)           |
| C10 | 22(1)           | 48(1)           | 35(1)           | -5(1)           | 2(1)            | -9(1)           |
| C11 | 26(1)           | 34(1)           | 26(1)           | -10(1)          | -9(1)           | 9(1)            |
| C12 | 38(1)           | 40(1)           | 18(1)           | 4(1)            | -1(1)           | 0(1)            |
| C13 | 26(1)           | 18(1)           | 20(1)           | 1(1)            | 8(1)            | 1(1)            |
| C14 | 18(1)           | 17(1)           | 16(1)           | 2(1)            | 0(1)            | 2(1)            |
| C15 | 22(1)           | 17(1)           | 24(1)           | 1(1)            | 3(1)            | -1(1)           |
| C16 | 27(1)           | 21(1)           | 20(1)           | -6(1)           | 0(1)            | 5(1)            |
| C17 | 25(1)           | 28(1)           | 20(1)           | 3(1)            | 7(1)            | 7(1)            |
| C18 | 28(1)           | 22(1)           | 26(1)           | 5(1)            | 10(1)           | 1(1)            |
| N1  | 22(1)           | 17(1)           | 14(1)           | 1(1)            | 5(1)            | 2(1)            |
| N2  | 16(1)           | 21(1)           | 17(1)           | 0(1)            | 4(1)            | 0(1)            |
| N3  | 28(1)           | 34(1)           | 17(1)           | 4(1)            | 2(1)            | -5(1)           |
| N4  | 27(1)           | 15(1)           | 20(1)           | -1(1)           | 7(1)            | 0(1)            |
| B1  | 32(1)           | 20(1)           | 25(1)           | -2(1)           | 5(1)            | 0(1)            |
| B2  | 20(1)           | 30(1)           | 19(1)           | 0(1)            | 1(1)            | -3(1)           |
| F1  | 33(1)           | 57(1)           | 98(1)           | -20(1)          | 5(1)            | 7(1)            |
| F2  | 103(1)          | 20(1)           | 34(1)           | -1(1)           | 28(1)           | -14(1)          |
| F3  | 47(1)           | 28(1)           | 46(1)           | 9(1)            | -3(1)           | -12(1)          |
| F4  | 66(1)           | 42(1)           | 27(1)           | 0(1)            | 9(1)            | 17(1)           |
| F5  | 50(1)           | 42(1)           | 88(1)           | -21(1)          | 24(1)           | -5(1)           |
| F6  | 26(1)           | 69(1)           | 48(1)           | 25(1)           | -1(1)           | 7(1)            |

|    |       |       |       |       |      |        |
|----|-------|-------|-------|-------|------|--------|
| F7 | 64(1) | 83(1) | 20(1) | -7(1) | 5(1) | 1(1)   |
| F8 | 25(1) | 72(1) | 56(1) | 17(1) | 3(1) | -15(1) |

---

**Table 5.** Hydrogen coordinates ( $\times 10^4$ ) and isotropic displacement parameters ( $\text{\AA}^2 \times 10^3$ ) for **5**.

|      | x        | y        | z       | U(eq) |
|------|----------|----------|---------|-------|
| H1   | -725     | 7319     | 6900    | 20    |
| H2   | -968     | 9993     | 7489    | 28    |
| H3   | -2834    | 11846    | 7285    | 36    |
| H4   | -3918    | 12293    | 6429    | 38    |
| H5   | -3115    | 10897    | 5779    | 34    |
| H7A  | -1795    | 7825     | 5835    | 26    |
| H7B  | -500     | 8932     | 5646    | 26    |
| H9   | 3142     | 9276     | 6868    | 34    |
| H10  | 5309     | 9396     | 7574    | 42    |
| H11  | 4875     | 8380     | 8348    | 36    |
| H12  | 2306     | 7315     | 8404    | 39    |
| H13A | -180     | 5952     | 6163    | 25    |
| H13B | 1626     | 6120     | 6515    | 25    |
| H15  | 1160     | 4385     | 5557    | 25    |
| H16  | 2584     | 4334     | 4846    | 28    |
| H17  | 4034     | 6301     | 4627    | 29    |
| H18  | 4060     | 8286     | 5132    | 29    |
| H4N  | 2590(30) | 8250(30) | 5786(9) | 30(6) |

**Table 6.** Torsion angles [°] for **5**.

---

|                 |             |                |             |
|-----------------|-------------|----------------|-------------|
| N2-C2-C3-C4     | 0.0(3)      | C14-C13-N1-C7  | 72.2(2)     |
| C2-C3-C4-C5     | -0.2(3)     | N2-C1-N1-C13   | -156.86(15) |
| C3-C4-C5-C6     | 0.5(3)      | C8-C1-N1-C13   | 81.84(19)   |
| C4-C5-C6-N2     | -0.5(3)     | N2-C1-N1-C7    | -31.26(18)  |
| C4-C5-C6-C7     | 176.7(2)    | C8-C1-N1-C7    | -152.56(16) |
| N2-C6-C7-N1     | -15.9(2)    | C6-C7-N1-C13   | 153.52(15)  |
| C5-C6-C7-N1     | 166.7(2)    | C6-C7-N1-C1    | 29.77(19)   |
| N1-C1-C8-N3     | -145.71(17) | C5-C6-N2-C2    | 0.3(3)      |
| N2-C1-C8-N3     | 99.94(19)   | C7-C6-N2-C2    | -177.49(18) |
| N1-C1-C8-C9     | 35.5(3)     | C5-C6-N2-C1    | 174.15(18)  |
| N2-C1-C8-C9     | -78.8(2)    | C7-C6-N2-C1    | -3.6(2)     |
| N3-C8-C9-C10    | -0.1(3)     | C3-C2-N2-C6    | 0.0(3)      |
| C1-C8-C9-C10    | 178.5(2)    | C3-C2-N2-C1    | -173.06(18) |
| C8-C9-C10-C11   | 0.2(4)      | N1-C1-N2-C6    | 21.66(19)   |
| C9-C10-C11-C12  | -0.5(4)     | C8-C1-N2-C6    | 144.23(16)  |
| C10-C11-C12-N3  | 0.7(4)      | N1-C1-N2-C2    | -164.59(17) |
| N1-C13-C14-N4   | 25.0(2)     | C8-C1-N2-C2    | -42.0(2)    |
| N1-C13-C14-C15  | -156.79(18) | C9-C8-N3-C12   | 0.3(3)      |
| N4-C14-C15-C16  | -0.9(3)     | C1-C8-N3-C12   | -178.50(18) |
| C13-C14-C15-C16 | -179.09(18) | C11-C12-N3-C8  | -0.6(3)     |
| C14-C15-C16-C17 | 0.7(3)      | C15-C14-N4-C18 | 0.1(3)      |
| C15-C16-C17-C18 | 0.4(3)      | C13-C14-N4-C18 | 178.36(18)  |
| C16-C17-C18-N4  | -1.2(3)     | C17-C18-N4-C14 | 1.0(3)      |
| C14-C13-N1-C1   | -166.27(15) |                |             |

---

**Table 7.** Hydrogen bonds for **5** [Å] and [°].

| D-H...A        | d(D-H)  | d(H...A) | d(D...A) | <(DHA) |
|----------------|---------|----------|----------|--------|
| C1-H1...F5#1   | 1.00    | 2.51     | 3.160(2) | 122    |
| C1-H1...F6#1   | 1.00    | 2.43     | 3.384(2) | 160    |
| C2-H2...F6#2   | 0.95    | 2.49     | 3.144(2) | 126    |
| C2-H2...F8#2   | 0.95    | 2.48     | 3.391(3) | 160    |
| C7-H7A...F7#1  | 0.99    | 2.63     | 3.551(3) | 155    |
| C13-H13B...F8  | 0.99    | 2.45     | 3.181(3) | 131    |
| C15-H15...F1#3 | 0.95    | 2.55     | 3.327(3) | 139    |
| C17-H17...F3#4 | 0.95    | 2.46     | 3.207(2) | 136    |
| C17-H17...F7#5 | 0.95    | 2.56     | 3.165(3) | 122    |
| C18-H18...F4   | 0.95    | 2.43     | 3.119(3) | 130    |
| C18-H18...F4#4 | 0.95    | 2.56     | 3.396(3) | 148    |
| N4-H4N...F2    | 0.86(3) | 1.98(3)  | 2.782(2) | 155(2) |

Symmetry transformations used to generate equivalent atoms:

#1  $x-1, y, z$  #2  $-x+1/2, y+1/2, -z+3/2$  #3  $x, y-1, z$

#4  $-x+1, -y+2, -z+1$  #5  $-x+1, -y+1, -z+1$

## References:

- 1) SAINT V8.27B Bruker AXS Inc, (2012), Madison, WI.
- 2) Palatinus, L. and Chapuis, G. (2007). Superflip. *J. Appl. Cryst.* 40, 786-790.
- 3) Sheldrick, G. M. (2008). SHELXL-2013. Program for the Refinement of Crystal Structures. *Acta Cryst.*, A64, 112-122.
- 4) Spek, A. L. (1998). PLATON, A Multipurpose Crystallographic Tool. Utrecht University, The Netherlands.
- 5) WinGX 1.64. (1999). An Integrated System of Windows Programs for the Solution, Refinement and Analysis of Single Crystal X-ray Diffraction Data. Farrugia, L. J. *J. Appl. Cryst.* 32. 837-838.
- 6)  $R_w(F^2) = \{ \sum w(|F_o|^2 - |F_c|^2)^2 / \sum w(F_o)^4 \}^{1/2}$  where w is the weight given each reflection.  
 $R(F) = \sum (|F_o| - |F_c|) / \sum |F_o|$  for reflections with  $F_o > 4(\sigma(F_o))$ .  
 $S = [ \sum w(|F_o|^2 - |F_c|^2)^2 / (n - p) ]^{1/2}$ , where n is the number of reflections and p is the number of refined parameters.
- 7) International Tables for X-ray Crystallography (1992). Vol. C, Tables 4.2.6.8 and 6.1.1.4, A. J. C. Wilson, editor, Boston: Kluwer Academic Press.
- 8) Sheldrick, G. M. (1994). SHELXTL/PC (Version 5.03). Siemens Analytical X-ray Instruments, Inc., Madison, Wisconsin, USA.
