# Supplementary material for: Mechanistic studies on covalent assemblies of metal-mediated hemi-aminal ethers
Source: Chem Sci. 2014 Sep 10;6(1):158–64. doi: 10.1039/c4sc02495h (PMC4267293; doi:10.1039/c4sc02495h)
Supplement: Supplementary file 2 [file SC-006-C4SC02495H-s002.pdf]

## Supporting Information

### Mechanistic Studies on Dynamic Multi-Component Covalent Assemblies of Metal-Mediated Hemi-Aminal Ethers†

Hyun Hwa Jo,<sup>a</sup> Ramakrishna Edupuganti,<sup>a,c</sup> Lei You,<sup>b</sup> Kevin N. Dalby<sup>c</sup> and

Eric V. Anslyn\*<sup>a</sup>

<sup>a</sup> *Department of Chemistry, The University of Texas at Austin, Austin, Texas, 78712, USA.*

<sup>b</sup> *Fujian Institute of Research on the Structure of Matter, Chinese Academy of Sciences, Fuzhou, 350002, P.R.China.*

<sup>c</sup> *Division of Medicinal Chemistry, The University of Texas at Austin, Austin, Texas, 78712, USA.*

#### **Content**

|                                                 |    |
|-------------------------------------------------|----|
| General Information                             | S1 |
| Experimental Procedures                         | S2 |
| General Procedures for Multi-component Assembly |    |
| Synthesis of Pyridinium Salt (5)                |    |
| Hammett Plot using $\sigma^+$                   | S3 |
| NMR and Mass Spectra                            | S4 |

#### **General Information:**

NMR spectra were recorded on Agilent MR 400 at The University of Texas at Austin NMR facility. ESI-mass spectra were obtained on Agilent 6100 at The University of Texas at Austin mass spectrometry facility. Circular dichroism (CD) spectra were recorded on a Jasco J-815 spectropolarimeter at The University of Texas facility.

## Experimental Procedures:

### General Procedures for Multi-component Assembly

All assembly reactions for kinetics and LEFR studies were performed *in situ* in acetonitrile without isolation and purification. Pyridine-2-carboxyaldehyde (**2-PA**, 35 mM, 1 equiv.), zinc triflate ( $\text{Zn}(\text{OTf})_2$ , 35 mM, 1 equiv.), di-(2-picolyl)amine (**DPA**, 42mM, 1.2 equiv.), 4-penten-2-ol (ROH, 175 mM, 5 equiv. except for the alcohol dependence studies), and 4-(2-chloroethyl)morpholine hydrochloride (CEM-HCl, 35 mM, 1 equiv.) were stirred together in acetonitrile in the presence of 3Å activated molecular sieves. The mixture was stirred at room temperature.

### Synthesis of Pyridinium Salt (5)

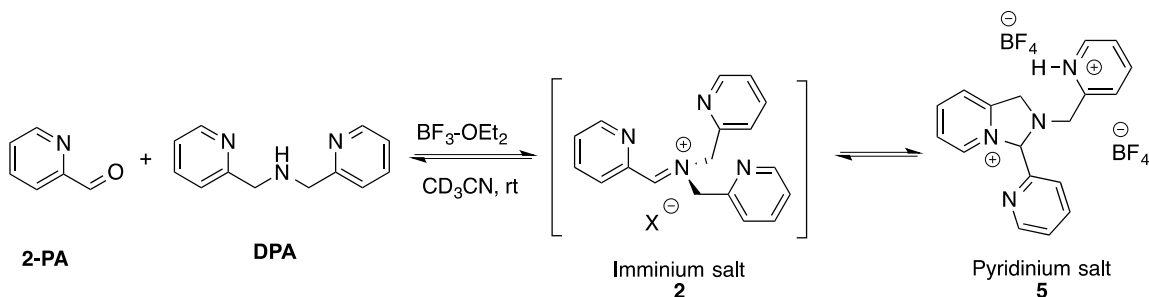

To pyridine-2-carboxaldehyde (**2-PA**, 3.21 mg, 0.03 mmol) in dry  $\text{CD}_3\text{CN}$  solution (60 mM), dipicolylamine (**DPA**, 7.17 mg, 0.036 mmol) was added. Then,  $\text{BF}_3\text{-OEt}_2$  (5.11  $\mu\text{L}$ , 0.036 mmol) was added dropwise. The reaction mixture was shaken for 3–5 min and then  $^1\text{H}$  NMR,  $^{13}\text{C}$  NMR, and mass spectrum were recorded.

**Hammett Plot using  $\sigma^+$ :**

| X      | $K_{eq}$ | $\sigma^+$ | $\log (k_X/k_H)$ |
|--------|----------|------------|------------------|
| OH     | 16.9     | -0.92      | -0.21            |
| Me     | 23.6     | -0.31      | -0.062           |
| H      | 27.2     | 0          | 0                |
| F      | 38.0     | -0.07      | 0.14             |
| alkyne | 36.3     | -          | 0.13             |
| Cl     | 40.1     | 0.11       | 0.17             |
| Br     | 39.7     | 0.15       | 0.16             |

**Table S2.**  $\sigma^+$  values and corresponding  $\log (k_X/k_H)$  values for encountered substituents.

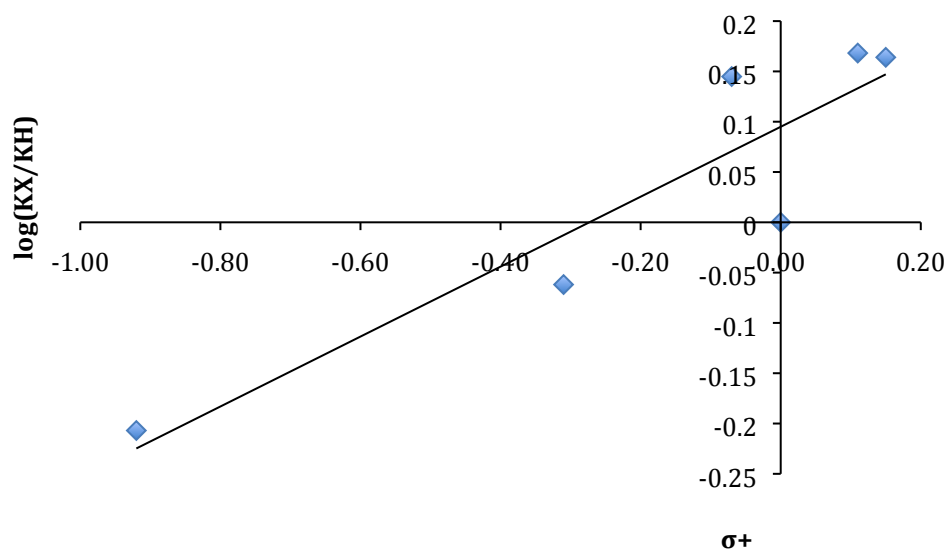

**Figure S2.** Hammett plot ( $\sigma^+$ ) for four-component assembly with para substituted **2-PA**.

## NMR and Mass Spectra:

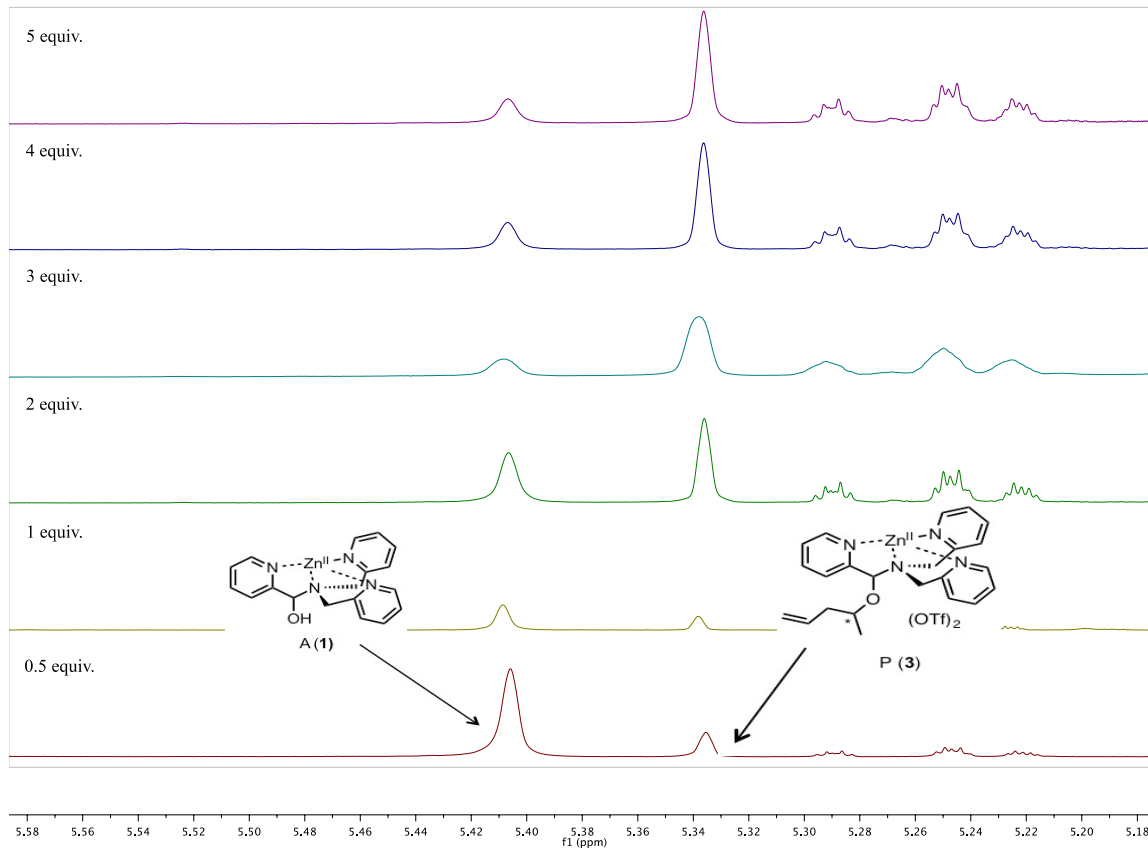

**Figure S4.**  $^1\text{H}$  NMR of multi-component assembly varying the concentration of alcohol from 17.5 mM (0.5 equiv.) to 210 mM (6 equiv.). For alcohol, 4-penten-2-ol was chosen for all kinetic studies.

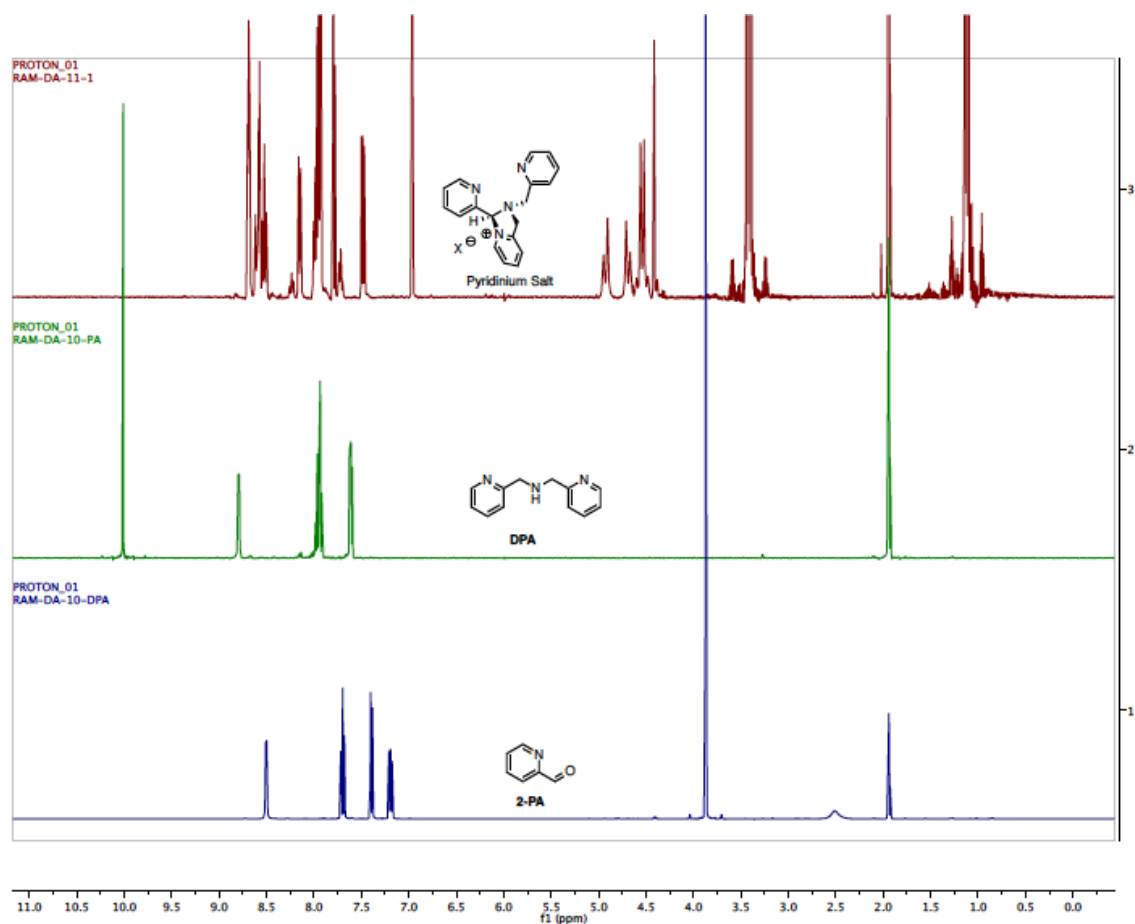

**Figure S5.**  $^1\text{H}$  NMR of pyridinium salt (**5**) formed from **2-PA** (1.0 equiv.), **DPA** (1.2 equiv.), and  $\text{BF}_3\text{-OEt}_2$  (1.2 equiv.) (top),  $^1\text{H}$  NMR of **DPA** (middle) and  $^1\text{H}$  NMR of **2-PA** (bottom). All nmrs recorded in  $\text{CD}_3\text{CN}$ .

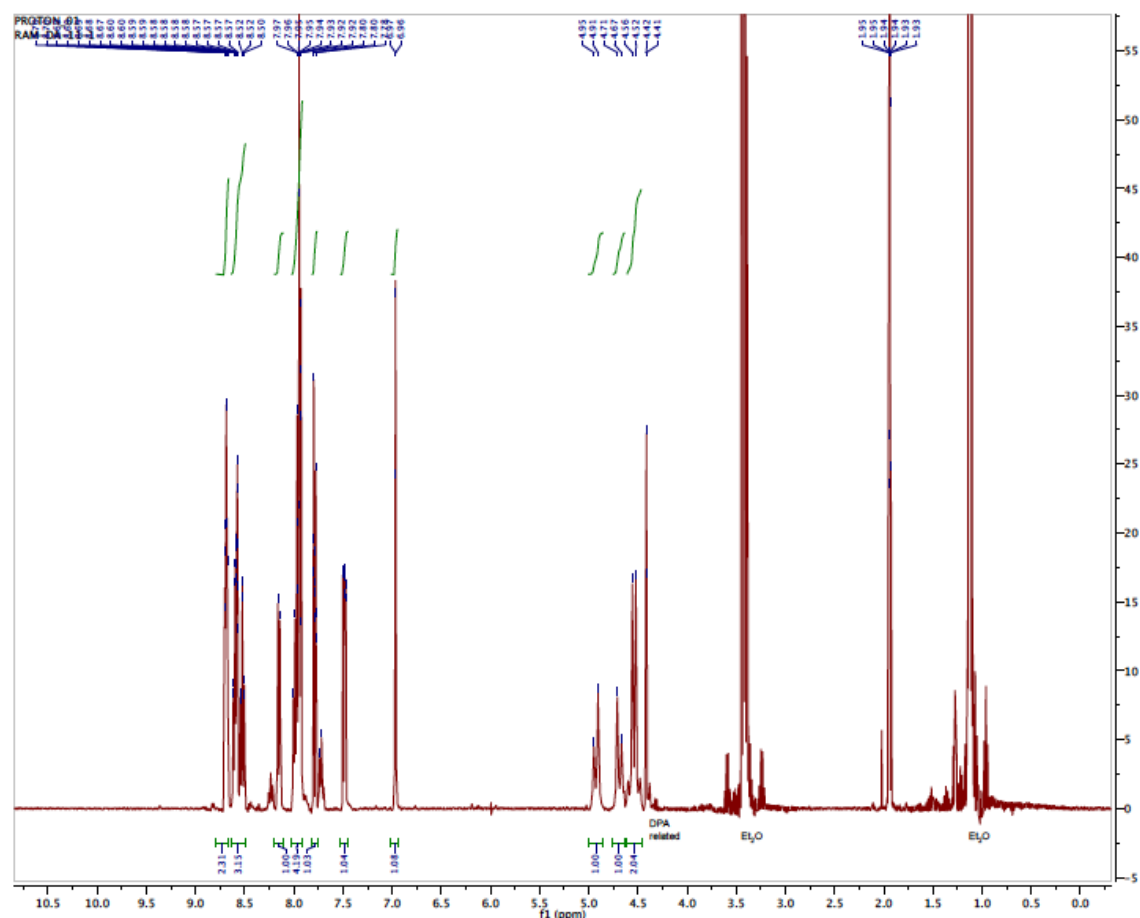

**Figure S6.**  $^1\text{H}$  NMR of pyridinium salt (**5**) formed from **2-PA**(1.0 equiv.), **DPA** (1.2 equiv.), and  $\text{BF}_3\text{-OEt}_2$  (1.2 equiv.) in  $\text{CD}_3\text{CN}$ .

Peaks corresponding to pyridinium salt (**5**):  $^1\text{H}$  NMR (400 MHz,  $\text{CD}_3\text{CN}$ )  $\delta$  8.72–8.66 (m, 2H), 8.62–8.50 (m, 3H), 8.15 (d,  $J = 8.0$  Hz, 1H), 8.00–7.91 (m, 4H), 7.79 (d,  $J = 8.0$  Hz, 1H), 7.48 (m, 1H), 6.97 (s, 1H), 4.93 (d,  $J = 16.8$  Hz, 1H), 4.69 (d,  $J = 16.8$  Hz, 1H), 4.58 (d,  $J = 16.8$  Hz, 1H), 4.50 (d,  $J = 16.8$  Hz, 1H).

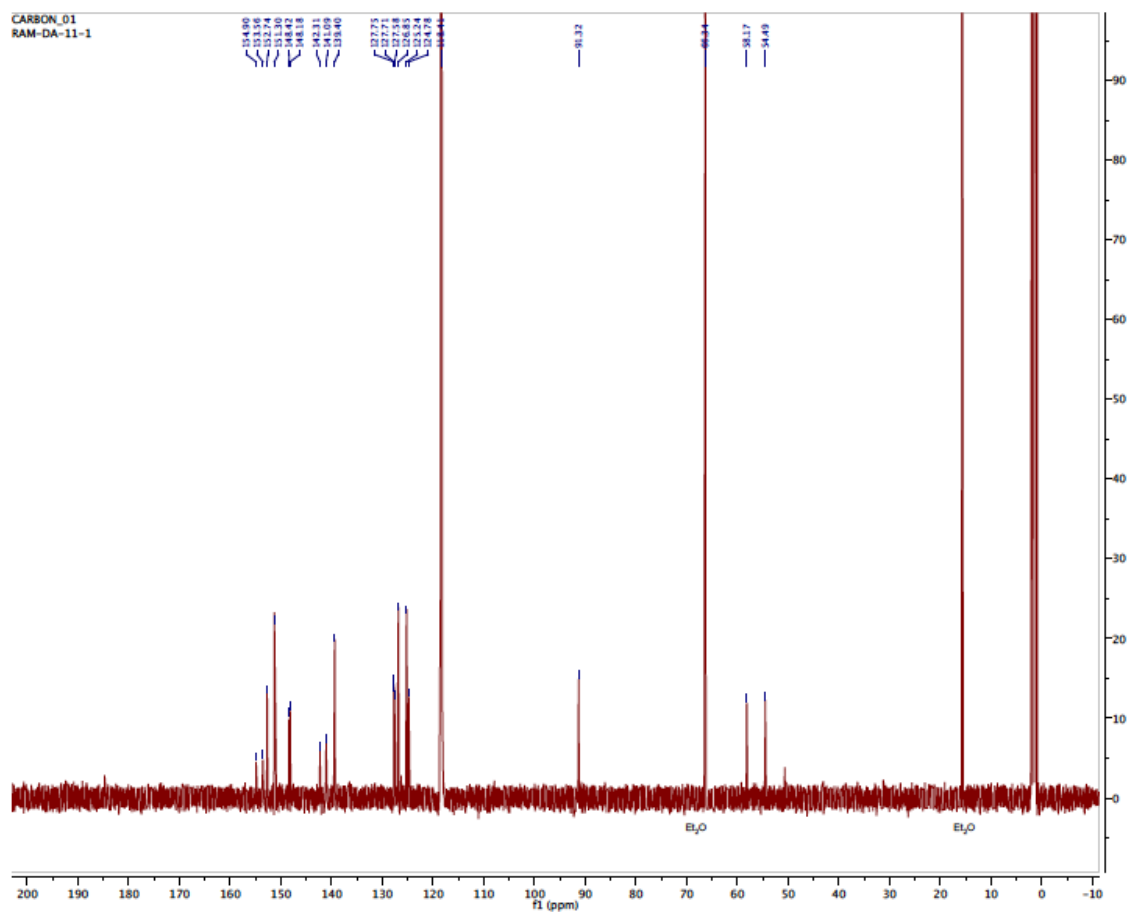

**Figure S7.**  $^{13}\text{C}$  NMR of pyridinium salt (**5**) formed from **2-PA**(1.0 equiv.), **DPA** (1.2 equiv.), and  $\text{BF}_3\text{-OEt}_2$  (1.2 equiv.) in  $\text{CD}_3\text{CN}$ .

Peaks corresponding to pyridinium salt (**5**):  $^{13}\text{C}$  NMR (100 MHz,  $\text{CD}_3\text{CN}$ )  $\delta$  154.9, 153.6, 152.7, 151.3, 148.4, 148.2, 142.3, 141.1, 139.4, 127.8, 127.7, 127.6, 126.9, 125.2, 124.5, 91.3, 58.2, 54.5.

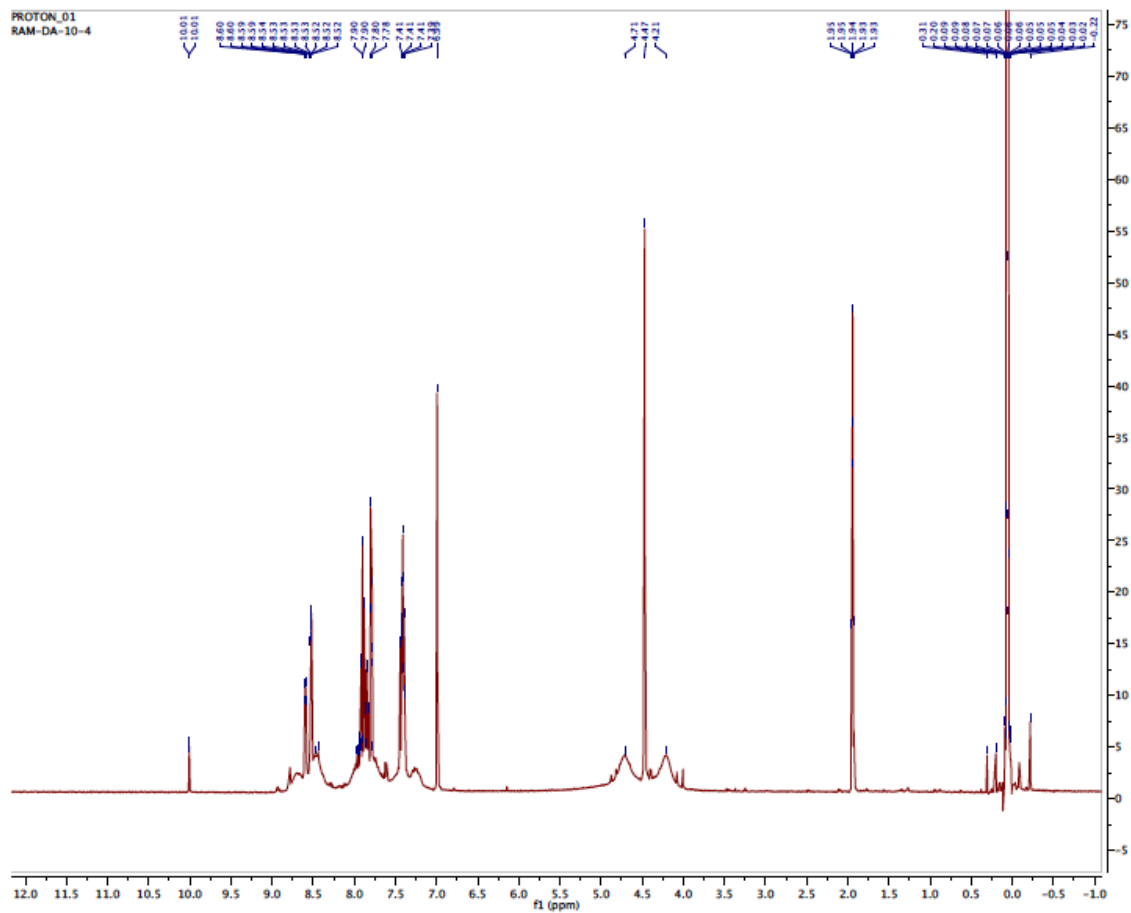

**Figure S8.**  $^1\text{H}$  NMR of pyridinium salt (**5**) formed from **2-PA** (1.0 equiv.), **DPA** (1.2 equiv.) and TMS-OTf (1.2 equiv.) in  $\text{CD}_3\text{CN}$ .

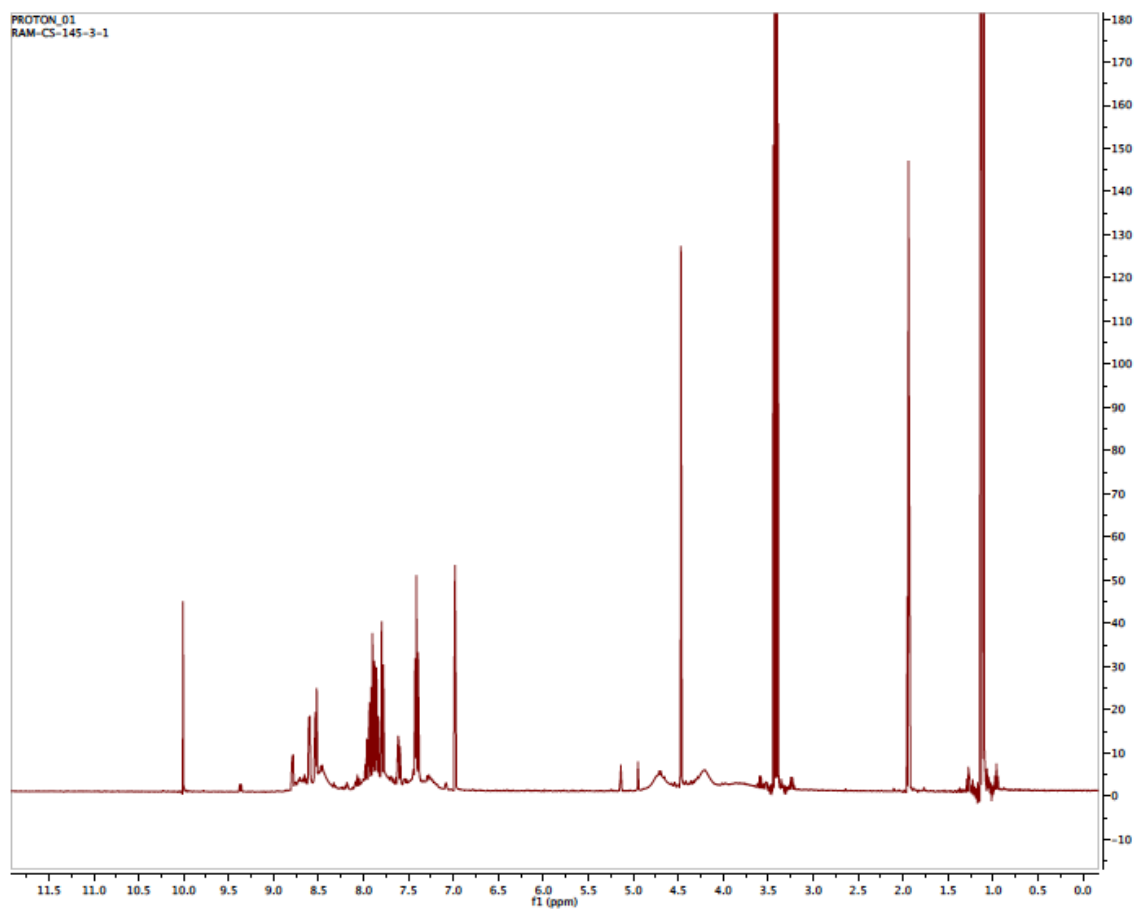

**Figure S9.** <sup>1</sup>H NMR of pyridinium salt (**5**) formed from **2-PA** (1.0 equiv.), **DPA** (1.0 equiv.) and BF<sub>3</sub>-OEt<sub>2</sub> (1.0 equiv.) in CD<sub>3</sub>CN.

Data File MSF14-2504(RAM-CS-157-C)\_hrESIpos3.d  
Position P1-D4  
Acq Method pos.m

Sample Name 2504  
Instrument Name Instrument 1  
Acquired Time 5/8/2014 6:15:48 PM

Comment RAM-CS-157-C  
User Name  
DA Method Ian.m

MS Zoomed Spectrum

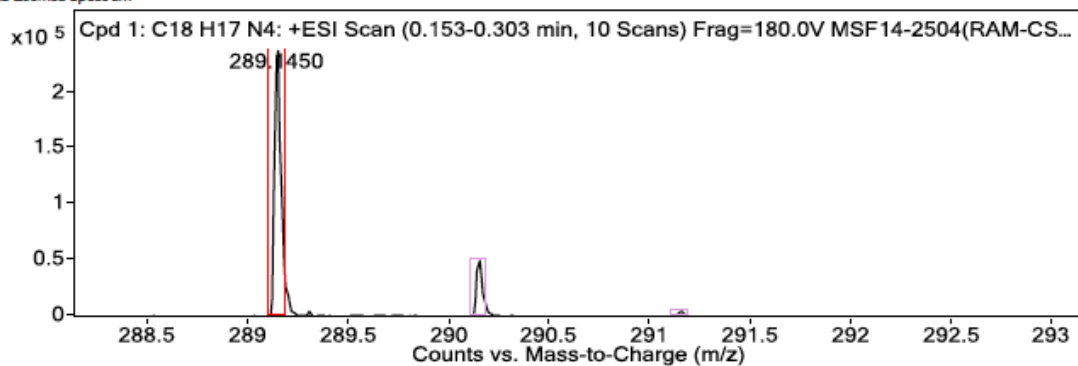

MS Spectrum Peak List

| Obs. m/z  | Calc. m/z | Charge | Abund     | Formula                                        | Ion/Isotope | Tgt Mass Error (ppm) |
|-----------|-----------|--------|-----------|------------------------------------------------|-------------|----------------------|
| 289.14500 | 289.14480 | 1      | 244633.53 | C <sub>18</sub> H <sub>17</sub> N <sub>4</sub> | M+          | -0.69                |

— End Of Report —

**Figure S10.** Mass spectrum of pyridinium salt (**5**) generated from **2-PA**, **DPA** and BF<sub>3</sub>-OEt<sub>2</sub>. HRMS calcd for C<sub>18</sub>H<sub>17</sub>N<sub>4</sub><sup>+</sup> (M<sup>+</sup>) 289.1448. Found 289.1450.

Data File MSF14-2503(RAM-CS-157-A)\_hrESIpos1.d  
 Position P1-D3  
 Acq Method pos.m

Sample Name 2503  
 Instrument Name Instrument 1  
 Acquired Time 5/8/2014 5:59:58 PM

Comment RAM-CS-157-A  
 User Name  
 DA Method Iar.m

MS Zoomed Spectrum

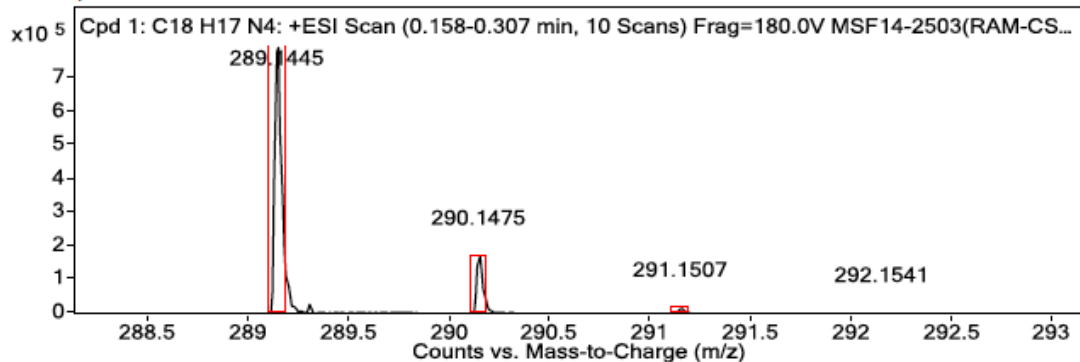

MS Spectrum Peak List

| Obs. m/z  | Calc. m/z | Charge | Abund     | Formula  | Ion/Isotope | Tgt Mass Error (ppm) |
|-----------|-----------|--------|-----------|----------|-------------|----------------------|
| 289.14450 | 289.14480 | 1      | 816216.9  | C18H17N4 | M+          | 1.01                 |
| 290.14750 | 290.14770 | 1      | 171349.73 | C18H17N4 | M+          | 0.92                 |
| 291.15070 | 291.15060 | 1      | 16915.33  | C18H17N4 | M+          | -0.31                |
| 292.15410 | 292.15350 | 1      | 1405.73   | C18H17N4 | M+          | -2.12                |
| 343.15280 |           |        | 855700.24 |          |             |                      |

— End Of Report —

**Figure S11.** Mass spectrum of pyridinium salt generated from **2-PA**, **DPA** and TMS-OTf. HRMS calcd for  $C_{18}H_{17}N_4^+$  ( $M^+$ ) 289.1448. Found 289.1445.
